Published by

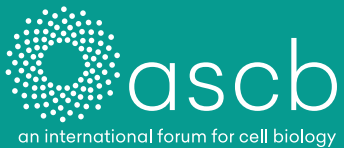

Editorial Partner

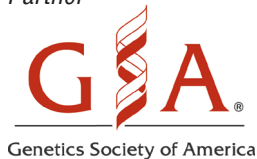

Volume 14, Fall 2015

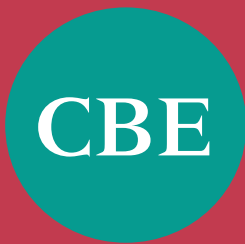

# Life Sciences Education

[www.lifescied.org](http://www.lifescied.org)

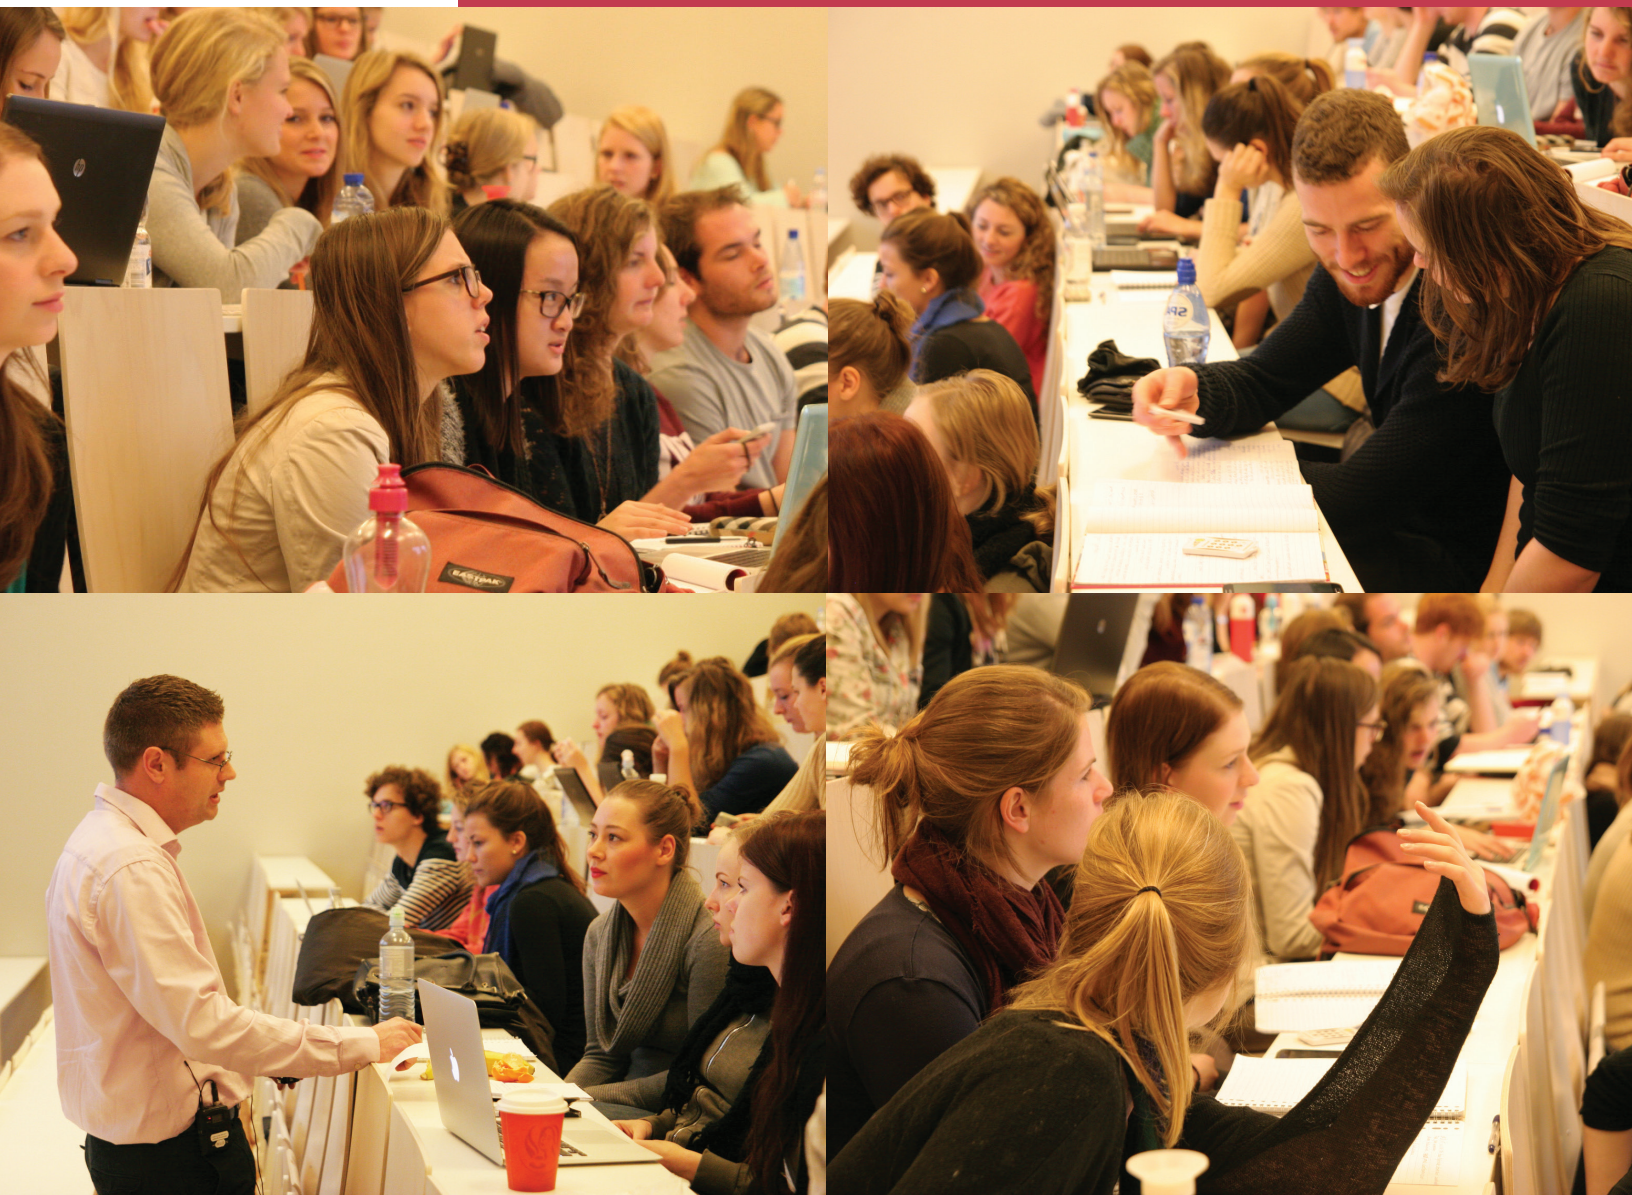

## Flipping the Classroom
